# Supplementary material for: The Accuracy of Clinical Staging of Stage I-IIIa Non-Small Cell Lung Cancer: An Analysis Based on Individual Participant Data
Source: PubMed Central journal article supplement (PMC6435782; doi:10.1016/j.chest.2018.10.020), 2018-10-26
Supplement: mmc1.pdf [file mmc1.pdf]

# The Accuracy of Clinical Staging of Stage I-IIIa Non-Small Cell Lung Cancer

An Analysis Based on Individual Participant Data

*Neal Navani, MD, PhD; David J. Fisher, MSc; Jayne F. Tierney, PhD; Richard J. Stephens; and Sarah Burdett, MSc; on behalf of the NSCLC Meta-analysis Collaborative Group*

CHEST 2019; 155(3):502-509

*Online supplements are not copyedited prior to posting and the author(s) take full responsibility for the accuracy of all data.*

© 2018 AMERICAN COLLEGE OF CHEST PHYSICIANS. Reproduction of this article is prohibited without written permission from the American College of Chest Physicians. See online for more details. DOI: 10.1016/j.chest.2018.10.020

**e-Table 1.**

Comparison of TNM staging systems

| 4 <sup>th</sup> edition (1987)(29) |                                                                  | 5 <sup>th</sup> edition (1997)(30), 6 <sup>th</sup> edition (2002)(31) |                                                                |
|------------------------------------|------------------------------------------------------------------|------------------------------------------------------------------------|----------------------------------------------------------------|
| Stage I                            | T1,N0,M0<br>T2,N0,M0                                             | Stage IA<br>Stage IB                                                   | T1,N0,M0<br>T2,N0,M0                                           |
| Stage II                           | T1,N1,M0<br>T2,N1,M0                                             | Stage IIA<br>Stage IIB                                                 | T1,N1,M0<br>T2,N1,M0<br>T3,N0,M0                               |
| Stage IIIA<br><br>Stage IIIB       | T1,N2,M0<br>T2,N2,M0<br>T3,N0/1/2,M0<br>anyT,N3,M0<br>T4,anyN,M0 | Stage IIIA<br><br>Stage IIIB                                           | T1,N2,M0<br>T2,N2,M0<br>T3,N1/2,M0<br>anyT,N3,M0<br>T4,anyN,M0 |
| Stage IV                           | anyT, anyN, M1                                                   | Stage IV                                                               | anyT,anyN,m1                                                   |

**e-Figure 1. Flowchart describing clinical and pathological agreement, clinical over staging and clinical under staging**

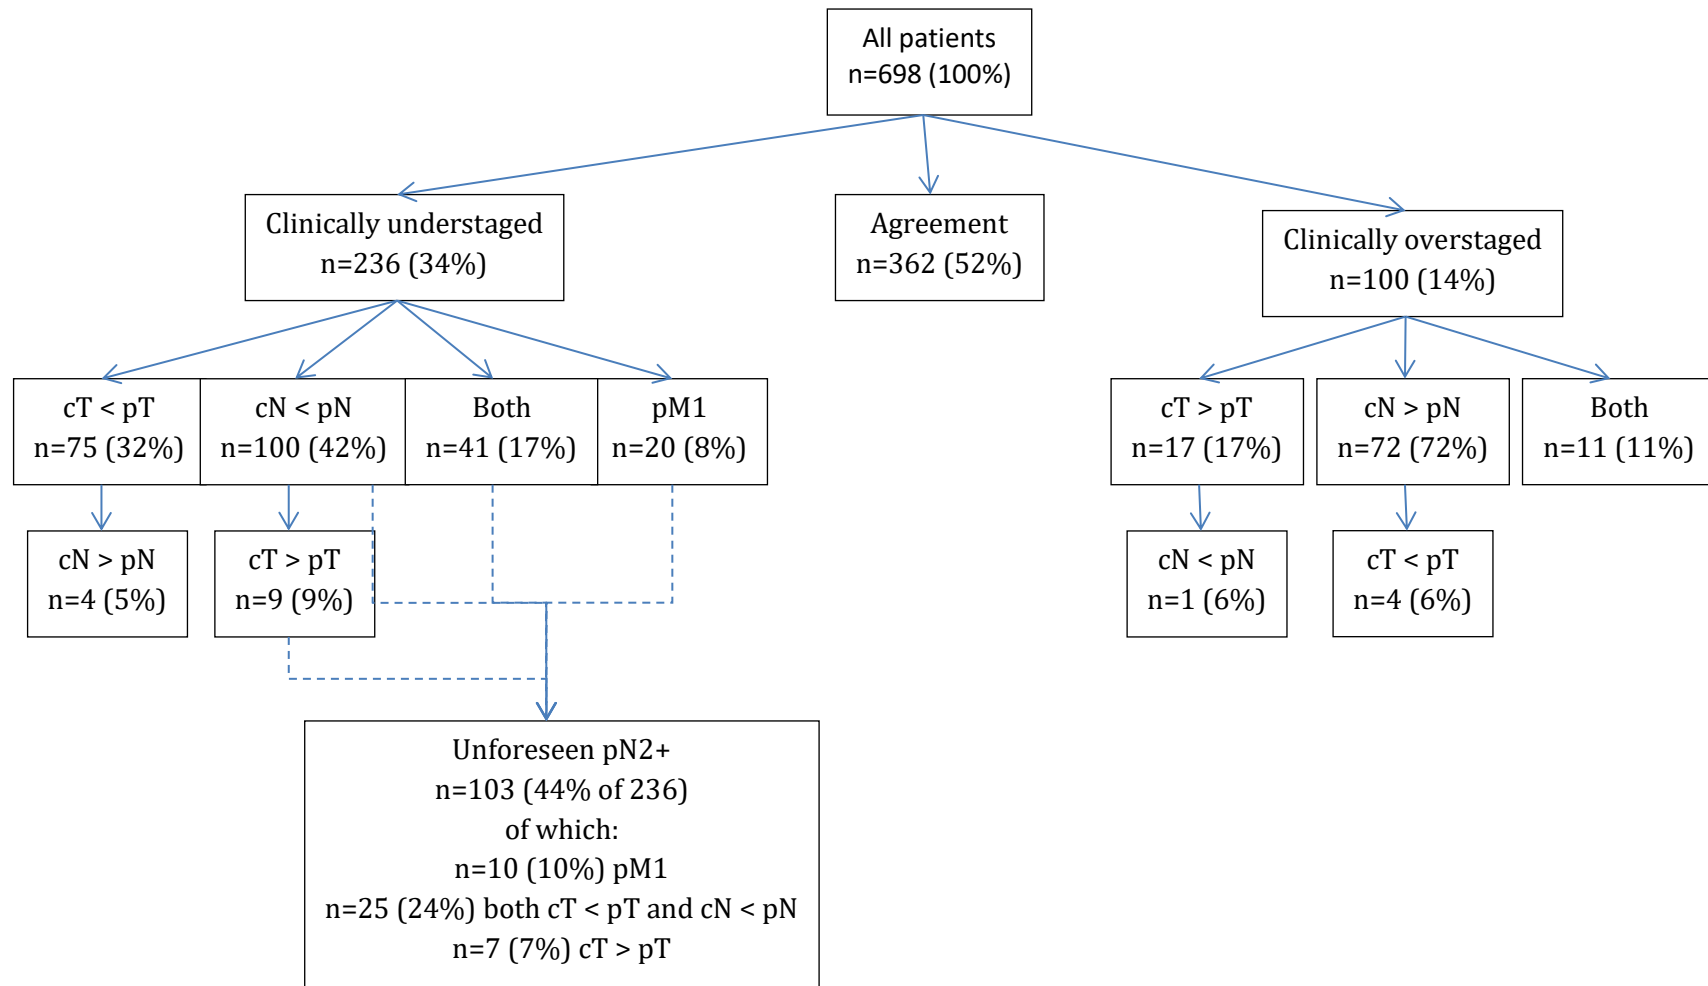

**e-Table 2.**

Multivariate logistic regression; Factors that may predict staging agreement

| Predictor       | TNM stage       |             |
|-----------------|-----------------|-------------|
|                 | $\chi^2$ (df)   | p-value     |
| Histology       | 0.40 (2)        | 0.82        |
| Staging method  | 1.01 (1)        | 0.32        |
| Age             | 2.48 (1)        | 0.12        |
| Gender          | 0.24 (1)        | 0.62        |
| <b>Overall*</b> | <b>4.22 (5)</b> | <b>0.52</b> |

“Overall” compares the model with all covariates entered to the null model

Sensitivity analysis with staging method replaced with year of accrual:

| Predictor             | TNM stage       |             |
|-----------------------|-----------------|-------------|
|                       | $\chi^2$ (df)   | p-value     |
| Histology             | 0.48 (2)        | 0.79        |
| Year of randomisation | 0.00 (1)        | 0.98        |
| Age                   | 2.55 (1)        | 0.11        |
| Gender                | 0.19 (1)        | 0.66        |
| <b>Overall*</b>       | <b>3.21 (5)</b> | <b>0.67</b> |
